# Supplementary material for: A 3-dimensional mathematical model of microbial proliferation that generates the characteristic cumulative relative abundance distributions in gut microbiomes
Source: PubMed Central journal article supplement (PMC5549704; doi:10.1371/journal.pone.0180863), 2017-08-08
Supplement: pone.0180863.s016.pdf [file pone.0180863.s016.pdf]

## S1 Appendix

### Species richness and diversity under the power law CRADs.

Here, we mathematically derive the relation between the sampling number  $N$  and the number of observed species  $K$ , and the value of Shannon index  $S$  under the assumption of power law distribution of population  $x$ .

$$P(> x) \propto x^{-\beta} \quad (1)$$

We introduce a theoretical technique of approximation of  $x_i$  by the following deterministic series which exactly fulfills eq.(1) [1]

$$x_i = K^{\frac{1}{\beta}} i^{-\frac{1}{\beta}} \quad (2)$$

We can derive the following relation

$$\begin{aligned} N &= \sum_{i=1}^K x_i \\ &= \sum_{i=1}^K K^{\frac{1}{\beta}} i^{-\frac{1}{\beta}} \\ &\approx K^{\frac{1}{\beta}} \left[ 1 + \frac{\beta}{\beta-1} \left( (K+1)^{-\frac{1}{\beta}+1} - 2^{-\frac{1}{\beta}+1} \right) \right] \end{aligned} \quad (3)$$

where the summation is approximated by the following integral.

$$\begin{aligned} \sum_{i=1}^K i^{-\frac{1}{\beta}} &\approx 1 + \int_2^{K+1} i^{-\frac{1}{\beta}} di \\ &= 1 + \frac{\beta}{\beta-1} \left( (K+1)^{-\frac{1}{\beta}+1} - 2^{-\frac{1}{\beta}+1} \right) \end{aligned} \quad (4)$$

Apparently, eq.(3) looks singular at  $\beta = 1$ , however, it is a continuous function of  $\beta$ , actually in the limit of  $\beta \rightarrow 1$ ,

$$\lim_{\beta \rightarrow 1} N \approx K[1 + \log(K+1) - \log 2] \quad (5)$$

Shannon index  $S$  is calculated in the same way as follows:

$$\begin{aligned} S &\equiv - \sum_{i=1}^K \frac{x_i}{N} \log \frac{x_i}{N} \\ &= - \sum_{i=1}^K \frac{K^{\frac{1}{\beta}} i^{-\frac{1}{\beta}}}{N} \log \frac{K^{\frac{1}{\beta}} i^{-\frac{1}{\beta}}}{N} \\ &\approx - \frac{K^{\frac{1}{\beta}}}{N} \log \frac{K^{\frac{1}{\beta}}}{N} - \int_2^{K+1} \frac{K^{\frac{1}{\beta}} i^{-\frac{1}{\beta}}}{N} \log \frac{K^{\frac{1}{\beta}} i^{-\frac{1}{\beta}}}{N} di \\ &= - \log \frac{K^{\frac{1}{\beta}}}{N} - \frac{1}{\beta-1} \left[ 1 - \frac{K^{\frac{1}{\beta}}}{N} \left\{ 1 + \frac{\log(K+1)}{(K+1)^{\frac{1}{\beta}-1}} - \frac{\log 2}{2^{\frac{1}{\beta}-1}} \right\} \right] \end{aligned} \quad (6)$$

Again, it looks singular at  $\beta = 1$ , it is a continuous function of  $\beta$ . In the limit of  $\beta \rightarrow 1$ ,

$$\lim_{\beta \rightarrow 1} S \approx \log \frac{N}{K} + \frac{K}{N} [(\log(K+1))^2 - (\log 2)^2] \quad (7)$$

## References

1. Takayasu M, Watanabe H, Takayasu H. Generalised Central Limit Theorems for Growth Rate Distribution of Complex Systems. J Stat Phys 2014 Feb;155:47-71
